# Supplementary material for: Synthesis and chiral recognition of optically active hydrogels containing helical polymer chains
Source: Royal Society of Chemistry journal article supplement (doi:10.1039/c0py00028k), 2010-01-01
Supplement: c0py00028k.pdf [file c0py00028k.pdf]

*Supporting information for*

## Synthesis and chiral recognition of optically active hydrogels containing helical polymer chains

Xiaoying Du, Jinbao Liu, Jianping Deng\*, Wantai Yang\*

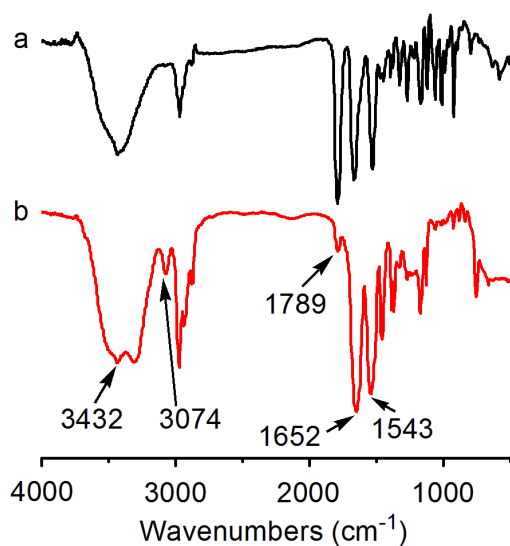

**Fig. S1** FT-IR spectra of (a) poly(1<sub>0.1</sub>-co-4<sub>0.9</sub>) and (b) poly(1<sub>0.1</sub>-co-4<sub>0.9</sub>)-based hydrogel (KBr tablet).
